# Supplementary material for: Sleep/wake scheduling scheme for minimizing end-to-end delay in multi-hop wireless sensor networks
Source: Springer Nature journal article supplement (doi:10.1186/1687-1499-2011-92), 2011-09-09

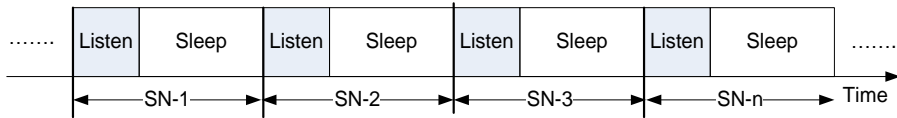

Supplement: 13638_2011_94_MOESM1_ESM.pdf [file 13638_2011_94_MOESM1_ESM.pdf]
