# Supplementary material for: Sleep/wake scheduling scheme for minimizing end-to-end delay in multi-hop wireless sensor networks
Source: Springer Nature journal article supplement (doi:10.1186/1687-1499-2011-92), 2011-09-09
Supplement: 13638_2011_94_MOESM15_ESM.pdf [file 13638_2011_94_MOESM15_ESM.pdf]

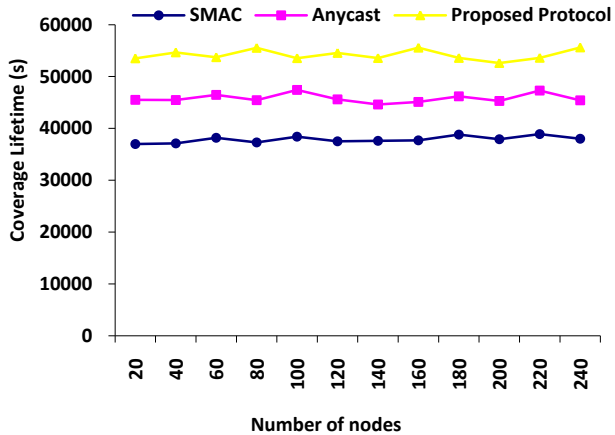

a. 100% coverage

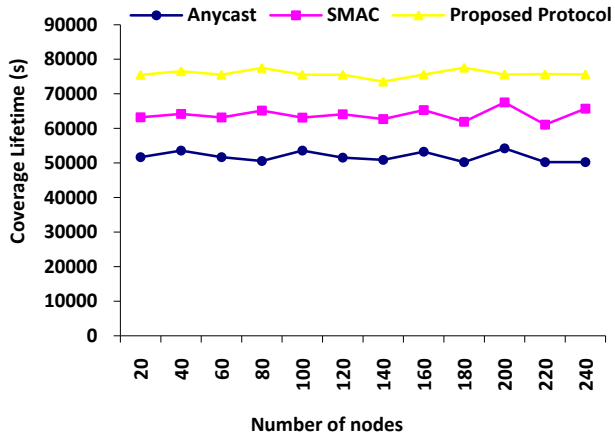

b. 90% coverage
